# Supplementary material
Source: MDPI journal article supplement (https://www.mdpi.com/2075-163X/13/12/1544)
Supplement: s1 [file s1]

Archive with 10 entries (10 files):
- S1_Supplement Material_Location images.pptx
- S2_Supplement Material_Assignment (majors).pptx
- S3_Supplement Material_Assignment (traces).pptx
- S4_Supplement Material_Ar-Ar analytical methodology.pdf
- S5-1_Supplemental Material_LF-21-54_GM.pdf
- S5-2_Supplemental Material_MM-CRB-32_PLAG.pdf
- S5-3_Supplemental Material_LMF-19-80_GM.pdf
- S6_Supplemental Material_Chemical data.xlsx
- S7_Supplement Material_Additional plots.pptx
- S8_Supplement Material_additional Chemical data(Malheur Gorge, Siletzia, Cascades).xlsx
