# Supplementary material
Source: MDPI journal article supplement (https://www.mdpi.com/2075-163X/13/12/1544)
Supplement: s1 [file s1 › S6_Supplemental Material_Chemical data.xlsx]

## Sheet: Major and trace elemental data
Color code for sub unit			Site Location		Dug Bar								Tully Creek						Eagle Creek					China Creek							Riggins and Eagle Gulch				Pittsburg Saddle					Skookumchuck				Whitebird
AB1&2			Sample	LF-20-1	LF-20-2	LF-20-5	LF-21-34	LF-21-36	LF-21-38	LF-21-40		LF-20-7	LF-21-31	LF-21-32	LF-21-42	LF-21-44		LF-21-28	LF-21-29	LF-21-30		LF-21-20	LF-21-21	LF-21-22	LF-21-23	LF-21-24	LF-21-25	LF-21-26	LF-21-27		LF-21-03	LF-21-01	LF-21-02		LF-21-10	LF-21-11	LF-21-12		LF-21-04	LF-21-06	LF-21-07		LF-21-14	LF-21-15	LF-21-16	LF-21-18	LF-21-19		LF-21-54
AB3+ (#3-9)			Strat. Position	2	4	7	1	3	5	6												8	7	6	5	4	3	2	1														1	2	3	4	5		1
RC			Subunit	AB1& 2	AB1& 2	AB3+	AB1& 2	AB1& 2	AB1& 2	AB3+		AB1& 2	AB1& 2	AB1& 2	AB1& 2	AB1& 2		AB3+	AB1& 2	AB1& 2		AB3+	AB3+	AB3+	AB1& 2	AB1& 2	AB1& 2	AB1& 2	AB1& 2		AB1& 2	RC	RC		AB1& 2	RC	RC		RC	RC	RC		AB3+	AB3+	RC	RC	RC		AB1& 2
AB= American Bar			Latitude	45.8079	45.8043	45.8185	45.808	45.8078	45.812	45.8139		45.7467	45.7388	45.7388	45.7462	45.7429		46.0003	46.005	46.0109		45.9751	45.9747	45.9746	45.9743	45.974	45.974	45.9736	45.9733		45.442	45.6136	45.6136		45.6557	45.6555	45.66		45.703	45.703	45.703		45.74	45.74	45.7406	45.7406	45.7407		44.6674
RC= Rock Creek			Longitude	-116.691	-116.694	-116.707	-116.691	-116.692	-116.696	-116.697		-116.76	-116.773	-116.773	-116.767	-116.766		-116.703	-116.709	-116.719		-116.734	-116.734	-116.733	-116.733	-116.733	-116.732	-116.732	-116.732		-116.33	-116.273	-116.273		-116.395	-116.394	-116.394		-116.315	-116.314	-116.314		-116.319	-116.319	-116.318	-116.318	-116.318		-117.117
GR=Grande Ronde			Wt.%, normalized
pre-N Sum =			SiO2	51.4435	51.2055	51.3842	51.402	51.4186	51.261	51.9427		51.4256	51.4116	51.4243	51.5061	51.3894		50.795	50.3898	51.2909		52.5478	51.0195	52.2084	51.3518	51.4248	51.3114	51.2083	51.4603		51.3323	50.4327	50.3268		51.5424	51.3478	51.4585		49.4289	49.8138	50.5307		51.4776	51.4642	49.7316	49.6894	49.9157		49.3847
pre normalization sum			TiO2	1.68098	1.71397	2.02282	1.705	1.72472	1.71477	1.9605		1.67178	1.62572	1.64386	1.6892	1.55968		2.12646	1.76935	1.6328		2.50523	2.18665	2.17833	1.73119	1.66716	1.75433	1.59976	1.68778		1.71873	2.99058	2.9523		1.67095	1.69359	1.71245		2.82413	2.85434	2.82723		2.15316	2.16447	3.10438	3.12335	3.01249		1.95294
LOI = Loss on ignition			Al2O3	14.9061	14.6408	14.6428	14.7996	14.7266	14.7627	15.5734		15.8352	16.0993	15.5281	16.0117	15.8426		13.9254	16.5932	15.217		14.5076	16.6247	15.1042	15.004	15.1414	14.7675	15.2722	14.9803		14.5025	14.4466	14.3169		16.3347	15.8888	16.0899		16.0604	15.7542	15.5087		14.6492	14.797	15.5393	15.3986	15.1948		16.4822
Strat position:			FeO*	11.8914	12.3159	13.1542	12.0523	12.0044	12.2265	11.4764		11.6609	11.0388	11.6803	11.2903	11.2813		13.626	11.3075	11.8643		12.1851	10.9995	11.7958	11.7943	11.6853	12.2863	11.6509	11.8654		12.4728	13.943	13.74		11.1652	11.4224	11.2288		13.094	13.0186	12.9348		13.1118	12.9403	13.0833	13.1639	13.0629		11.9352
1= stratigraphic lowest			MnO	0.201453	0.199002	0.213623	0.197676	0.198662	0.196835	0.188577		0.189609	0.183237	0.196525	0.184667	0.197006		0.226108	0.232955	0.191883		0.191729	0.174818	0.188232	0.192944	0.187095	0.200506	0.195656	0.196755		0.208347	0.206198	0.206112		0.179592	0.190812	0.191724		0.183112	0.185097	0.173979		0.219075	0.214864	0.244386	0.25959	0.195347		0.183362
analyzed sample			MgO	5.71609	5.89789	4.94076	5.83055	5.85026	5.87205	4.86971		5.08187	5.46517	5.638	5.15443	5.7791		5.56652	5.39611	5.70228		4.52687	4.86079	4.73461	5.75003	5.73144	5.64961	5.92204	5.68434		5.85585	4.79699	4.91811		4.98409	5.34604	5.25196		4.84314	5.00837	4.48806		4.77479	4.7776	4.52043	4.57172	5.03805		5.88932
			CaO	10.5849	10.5291	9.69295	10.3642	10.4076	10.5126	9.78706		10.394	10.5686	10.1923	10.2277	10.414		9.75754	10.9376	10.5305		8.99633	9.63615	9.50948	10.5177	10.5846	10.3901	10.5904	10.4216		10.3349	8.55864	8.28533		10.3211	10.3037	10.3295		9.70661	9.33395	8.80241		9.66001	9.70713	9.3855	9.33071	9.04576		10.1153
			Na2O	2.86879	2.83881	2.95575	2.90353	2.89128	2.77048	2.9925		2.95992	2.8704	2.82901	3.01691	2.81889		2.931	2.89458	2.90681		3.1564	3.1805	3.10084	2.94569	2.8998	2.89198	2.88974	2.97153		2.96352	3.23162	3.23753		2.981	2.99142	2.91287		3.02491	3.06098	3.22883		2.96623	2.93395	3.09237	3.10697	3.19559		3.11674
			K2O	0.495453	0.447203	0.691224	0.540172	0.570956	0.477753	0.912667		0.547434	0.517192	0.641569	0.690933	0.506873		0.750194	0.222135	0.469479		0.990064	0.956662	0.842349	0.500785	0.477135	0.540101	0.482904	0.527751		0.406598	0.944074	1.56619		0.585651	0.585896	0.585764		0.417135	0.545837	1.09946		0.674761	0.691188	0.816456	0.872605	0.87296		0.63973
			P2O5	0.211244	0.211856	0.301664	0.204998	0.206941	0.205308	0.296464		0.233712	0.22004	0.226063	0.227955	0.211184		0.295781	0.256815	0.194055		0.392732	0.360788	0.33784	0.211583	0.201185	0.208206	0.188142	0.204357		0.204443	0.449551	0.450629		0.235339	0.229495	0.238573		0.417672	0.424883	0.405829		0.313357	0.309362	0.482281	0.483184	0.466318		0.300484
			pre-N Sum	98.6171	97.8345	98.4157	98.7245	98.5306	97.4607	100		98.4793	98.6229	98.8559	98.6287	98.5651		100	96.0462	99.0101		98.4785	98.0141	98.5457	98.4013	98.5185	98.7006	98.8962	98.8394		99.3819	98.2181	98.73		98.6049	98.7167	97.718		94.4801	95.9445	95.5702		97.9894	97.7755	97.3913	97.9959	98.1948		96.6693
			LOI %	1.10238	1.69811	1.00088	0.938967	1.37521	2.20158	1.08157		1.09406	1.16775	0.786318	1.01843	1.10319		0.469256	3.50524	0.769338		1.12577	1.65379	1.10576	1.37803	1.26544	1.05434	0.784424	0.793009		0.549339	1.31979	0.8657		1.39335	0.855952	1.81992		5.27383	3.85974	4.08211		1.83318	1.94943	2.40582	1.8049	1.2689		2.89256
			Mg#	46.15	46.0566	40.1074	46.3088	46.4919	46.1284	43.0691		43.7249	46.8843	46.2535	44.8717	47.7347		42.1412	45.9698	46.1466		39.8443	44.0677	41.7118	46.5012	46.6515	45.0496	47.5401	46.0661		45.5646	38.0185	38.956		44.3165	45.4875	45.4712		39.7388	40.6841	38.2188		39.3665	39.6953	38.1189	38.2404	40.7446		46.8014
			XRF, ppm
			Ni	43.1649	42.1231	31.8228	42.9505	41.2175	40.1746	27.1386		39.372	46.4371	41.206	39.186	45.728		43.7094	37.2026	44.9039		17.2711	53.4144	22.9196	41.9003	46.068	41.7515	46.4855	42.2546		43.6801	58.7538	63.3572		40.4494	39.6639	39.7421		67.5783	73.5459	62.8071		28.342	30.9393	65.4876	73.0503	63.7671		88.7726
			Cr	143.102	137.585	66.0294	138.354	137.122	136.267	62.8422		73.7081	103.733	95.6346	78.9984	108.901		72.4513	87.0489	151.759		28.0425	78.7614	50.6394	140.797	152.147	132.448	156.132	142.408		149.891	56.1096	58.6209		76.5661	81.0882	74.6574		76.8833	77.9366	78.2943		63.7464	65.1476	91.8207	91.1815	87.1268		76.6682
			Sc	40.1584	40.9206	38.7858	43.7748	43.5577	42.4479	36.0256		36.8791	40.3629	39.6047	38.5403	38.6792		45.9156	40.4744	42.5594		31.6548	28.7	32.7698	43.7034	41.9127	44.7344	42.604	43.0389		44.1204	34.3579	33.182		36.8763	38.721	37.3189		31.1419	31.5656	31.1753		40.1956	40.1176	32.8672	33.4275	30.9622		32.6073
			V	340.788	347.223	374.555	344.668	348.6	344.539	308.42		327.422	320.718	324.728	326.047	309.773		405.791	331.723	334.987		309.345	268.889	306.41	354.97	336.579	355.05	327.853	343.016		350.111	315.978	316.414		311.454	331.581	315.972		293.843	297.913	297.236		385.393	391.015	304.59	305.92	293.69		324.351
			Ba	214.064	203.784	278.956	221.561	235.32	209.351	360.789		259.095	251.577	254.575	272.747	222.757		332.587	187.352	207.343		498.489	390.873	416.88	231.972	215.26	221.621	205.236	220.464		215.927	490.494	480.315		267.697	273.378	262.659		351.95	409.276	444.161		336.664	320.544	424.677	416.257	449.653		291.789
			Rb	9.5147	9.17824	18.3446	10.3331	10.0869	9.67057	19.7466		9.03107	11.9646	14.9607	12.8982	14.6838		16.345	0.395524	8.9784		24.7697	18.1743	20.9035	3.36891	8.79053	10.8123	9.79912	8.04892		9.78923	21.6937	31.1091		13.6557	11.7954	12.7655		1.46344	10.4913	18.5896		19.173	19.7762	22.6582	23.97	23.5625		10.7868
			Sr	273.438	271.435	240.036	273.232	277.009	269.802	311.816		319.298	269.713	261.547	314.243	259.264		292.064	325.587	273.232		389.449	396.092	349.342	277.407	277.987	272.062	275.229	270.088		270.514	338.085	325.141		327.816	320.387	321		384.971	385	360.899		260.499	253.382	369.647	367.501	368.912		423.745
			Zr	119.893	120.712	165.773	122.289	124.174	121.775	174.074		128.925	133.246	136.782	130.296	127.551		160.917	134.253	115.875		228.809	192.062	197.335	121.426	119.596	124.504	113.346	119.452		123.46	255.396	252.287		136.217	131.093	136.155		230.742	235.532	226.137		180.622	179.779	264.949	266.55	257.263		128.23
			Y	31.2283	31.9661	39.2362	32.2977	30.99	30.7654	34.4967		30.6233	31.4619	32.1285	30.4227	31.1534		37.9294	32.1584	30.0689		38.0388	32.8549	35.7603	30.99	30.835	32.51	29.5913	30.7355		32.0191	45.6885	45.0054		30.6009	30.1607	31.4321		38.5861	40.2179	38.4667		41.2826	41.3323	43.47	43.2	42.27		28.4416
			Nb	5.858	6.2062	10.02	7.0247	6.66	6.43765	11.0744		6.8544	7.8406	8.1988	7.128	7.55205		9.86045	7.2436	5.6914		16.2284	13.2136	14.1986	5.4	6.8058	6.55	6.1093	5.62175		6.33815	18.3051	16.83		8.3754	7.0723	7.4227		16.0394	17.2035	16.1986		10.5569	10.4475	19.71	18.88	18.83		7.1306
			Ga	19.5491	19.1645	20.1597	18.5866	18.16	19.0742	19.0941		19.7149	18.5767	17.6413	19.6911	17.7508		21.0243	19.5418	19.1637		22.3477	21.2532	21.9298	18.88	19.0841	18.33	18.1787	18.8254		19.502	22.9284	23.2749		20.5722	19.0007	20.2582		23.3725	22.8153	22.3477		20.6661	20.9447	23.37	22.42	23.53		20.0586
			Cu	155.639	153.527	253.334	166.354	157.56	156.155	96.2861		126.225	135.28	133.857	138.877	127.101		194.751	140.534	152.504		43.4318	113.569	73.5703	155.66	154.036	166.65	150.733	155.489		162.603	139.055	136.412		126.819	135.083	129.101		113.679	118.574	116.564		174.125	167.747	139.98	144.56	138.55		154.045
			Zn	98.9327	102.802	117.361	99.5086	100.295	97.9242	109.733		98.025	96.9697	98.5147	96.1593	91.764		119.308	99.8924	95.2968		130.723	112.587	118.383	101.898	98.0128	103.678	95.2279	100.562		103.504	139.877	141.698		100.389	98.2163	98.8886		130.477	131.146	129.71		117.507	117.261	137.571	137.65	131.845		105.707
			Pb	2.525	2.50085	10.1202	4.0596	2.57	1.9104	4.54715		2.121	3.15415	1.92035	3.2571	1.9502		4.12925	3.69145	2.03975		5.08445	5.0148	5.96005	2.73	1.4925	3.24	1.592	1.3134		2.7263	6.6825	5.4549		3.0096	2.23595	2.4676		5.0347	5.26355	4.4775		4.66655	4.7561	5.78	5.78	5.84		3.2118
			La	9.7776	9.80585	16.7835	12.432	10.7259	10.2479	15.4753		10.605	11.9248	10.5584	16.1391	12.2457		16.9349	13.55	10.2686		26.2512	19.6366	18.3944	9.80002	10.7241	8.13547	10.8379	10.6826		11.3141	26.4179	26.0162		13.7085	14.5513	13.6639		20.8891	23.3631	23.7461		15.3718	15.7238	26.1958	26.3831	24.4064		13.644
			Ce	24.139	23.511	34.569	21.9075	18.8862	16.8482	36.685		26.3868	26.9961	23.5679	25.8498	21.1554		26.1366	21.8977	17.5221		47.7218	44.8796	42.1546	17.3647	20.9894	21.4875	20.3838	17.7663		19.5243	52.1855	54.1388		26.7633	22.8669	23.1088		49.558	47.4874	45.7489		34.2335	37.4273	53.7433	54.7544	52.1531		25.6742
			Th	1.3116	1.2	2.004	1.10445	0	1.36315	1.9104		1.212	1.72135	0	1.0098	1.0547		1.78105	0.1592	0.14925		2.59695	1.5323	1.8706	0.2	0.8358	0.28	0.398	0.8756		0.16915	2.97	3.6036		1.2276	0.20685	1.1343		3.03475	2.29845	1.64175		1.4726	1.6915	2.72	2.01	2.25		0.6969
			Nd	15.9431	15.6156	22.1292	15.2362	15.8976	14.2402	22.0605		18.1121	17.0902	16.2421	16.7296	16.0942		19.7332	16.7155	13.3329		28.5889	26.1136	26.0939	14.9461	16.2717	16.5517	15.5025	16.1534		14.3881	33.94	35.4118		18.535	16.528	16.6169		31.9616	31.5178	29.3088		23.3129	24.0328	33.8071	37.7617	30.9923		17.473
			ICP-MS, ppm
			La	10.01	9.94	15.22	10.2032	10.108	10.0805	16.8387		11.5544	11.5676	11.9741	11.7874	11.0412		14.679	11.5359	9.54435		23.288	19.61	19.6746	10.154	9.71122	10.1656	9.1334	9.95378		10.1009	24.397	23.9743		12.3953	11.9246	12.4676		22.1705	22.1694	21.5656		16.8062	16.4219	25.1662	25.49	24.5606		11.8325
			Ce	23.21	23.12	34.64	23.5906	23.6738	23.4256	37.5146		26.1507	26.2305	27.2114	26.6509	25.1377		33.768	27.1771	22.1244		51.7612	44.1407	43.7208	23.5083	22.7772	23.894	21.5061	23.1621		23.6609	55.9948	55.6394		28.1778	27.2738	28.3225		50.9799	51.043	49.433		38.0678	37.0769	58.1162	58.7733	56.8705		27.8796
			Pr	3.33	3.33	4.83	3.40285	3.41564	3.36903	5.09572		3.73403	3.7349	3.80935	3.76341	3.56272		4.76908	3.81441	3.20303		6.99946	6.01654	5.88494	3.45925	3.28214	3.43185	3.15119	3.36142		3.44562	7.79648	7.67644		4.02007	3.88351	4.02591		7.07963	7.09765	6.92876		5.27882	5.1944	8.07465	8.11379	7.86953		4.10557
			Nd	15.76	16.01	22.17	16.0382	16.2368	15.9473	22.6667		17.4433	16.9652	17.3993	17.6481	16.3857		21.9641	17.7452	15.273		30.3674	26.4855	25.982	16.0245	15.1992	16.3294	14.7455	15.8615		16.4193	34.2953	34.0391		18.0172	17.7298	18.6151		31.2555	31.3752	30.6495		24.0706	23.0271	35.3324	35.9224	34.7795		19.11
			Sm	4.53	4.51	5.82	4.5676	4.53275	4.5432	5.77088		4.626	4.57512	4.65534	4.76886	4.46832		5.89475	4.79959	4.20656		7.62797	6.48483	6.50619	4.66897	4.40843	4.56951	4.32337	4.52131		4.7795	8.68864	8.46972		4.86798	4.81444	4.98237		7.83897	7.89751	7.52592		6.49123	6.33036	8.5712	8.61834	8.46505		5.04309
			Eu	1.57	1.56	1.85	1.58656	1.5841	1.55569	1.8549		1.58399	1.57852	1.59247	1.60147	1.52721		1.95274	1.62816	1.49425		2.24833	1.94864	2.04382	1.59943	1.57453	1.58522	1.47555	1.52672		1.59893	2.53256	2.42125		1.58667	1.61142	1.61852		2.32512	2.30873	2.22152		2.00636	1.91162	2.51217	2.57998	2.45284		1.6728
			Gd	5.36	5.42	6.78	5.39756	5.47038	5.37528	6.45925		5.33983	5.46517	5.46086	5.47392	5.14406		6.80579	5.57668	5.17737		7.8453	6.71565	7.08527	5.46586	5.27302	5.49912	5.01719	5.3148		5.62574	9.21141	9.00419		5.57422	5.5313	5.65087		8.25435	8.15945	7.92142		7.30571	7.1431	9.11876	9.18118	8.80778		5.43001
			Tb	0.91	0.93	1.16	0.949902	0.951399	0.930732	1.08004		0.917878	0.932741	0.961899	0.934564	0.912246		1.15093	0.930107	0.90838		1.24724	1.09833	1.15552	0.934454	0.912551	0.945078	0.87708	0.918005		0.934833	1.46897	1.41462		0.934508	0.951901	0.933732		1.27801	1.31369	1.25183		1.22676	1.19893	1.44292	1.42596	1.38308		0.918416
			Dy	5.53	5.59	6.97	5.61708	5.65172	5.72416	6.36985		5.39134	5.69698	5.86557	5.67246	5.55698		6.86566	5.66046	5.44412		7.13489	6.25506	6.62391	5.73169	5.52453	5.77172	5.35015	5.60203		5.81956	8.53456	8.38683		5.6006	5.73848	5.67088		7.51511	7.55713	7.2733		7.54238	7.44141	8.13381	8.32314	8.07303		5.32532
			Ho	1.17	1.17	1.48	1.16233	1.20178	1.1581	1.27919		1.12949	1.19584	1.20385	1.15246	1.12776		1.42604	1.15733	1.12961		1.439	1.23827	1.34398	1.18453	1.12975	1.2254	1.08882	1.18574		1.19578	1.7062	1.65917		1.15413	1.18563	1.19302		1.50526	1.50653	1.45898		1.5606	1.54157	1.60826	1.63872	1.58919		1.06042
			Er	3.13	3.17	3.98	3.20928	3.23763	3.25374	3.52412		3.06261	3.30374	3.33288	3.199	3.11026		3.95816	3.18858	3.13265		3.84952	3.39176	3.57882	3.2147	3.15544	3.41198	3.03065	3.19936		3.32817	4.6348	4.48222		3.21004	3.22639	3.15891		3.98204	4.05662	3.89326		4.37736	4.26106	4.31243	4.34693	4.17333		2.90024
			Tm	0.48	0.47	0.6	0.490588	0.491578	0.479464	0.526331		0.466494	0.499086	0.502572	0.471571	0.473378		0.589711	0.482029	0.461797		0.538846	0.487939	0.530011	0.481628	0.468599	0.494068	0.447147	0.476668		0.494097	0.664877	0.657988		0.479265	0.4835	0.482978		0.576928	0.575353	0.568357		0.643239	0.622596	0.627335	0.624097	0.61363		0.432011
			Yb	2.95	2.94	3.74	2.95517	2.97853	2.9804	3.1393		2.8343	3.01871	3.07669	2.86628	2.93766		3.64432	2.92773	2.82221		3.28514	2.94839	3.19645	2.99906	2.88738	3.10294	2.74335	2.94443		3.01822	4.16202	4.04722		2.87903	2.9568	2.92498		3.50405	3.53942	3.47362		3.99988	3.90291	3.75035	3.81523	3.68564		2.5697
			Lu	0.46	0.45	0.58	0.473032	0.475771	0.462255	0.492852		0.417604	0.482864	0.477234	0.452858	0.466871		0.589415	0.46006	0.435728		0.495776	0.451199	0.492311	0.456342	0.45965	0.461842	0.42444	0.462255		0.479299	0.617235	0.596565		0.45	0.444959	0.450923		0.536412	0.525135	0.52131		0.618407	0.60306	0.565429	0.555082	0.551682		0.40167
			Ba	209	201	275	209.628	223.85	196.39	347.038		253.497	243.523	237.234	261.291	215.56		312.464	178.308	195.263		474.834	381.467	403.41	219.904	205.239	208.827	192.676	212.574		200.835	472.544	464.441		254.9	263.332	251.779		336.621	392.022	427.787		325.979	303.7	406.298	389.307	425.579		275.535
			Th	1.37	1.36	2.33	1.36475	1.36952	1.36084	2.49338		1.53105	1.68181	1.7566	1.54312	1.56976		1.81505	1.53574	1.26625		3.42537	2.82674	2.88368	1.3425	1.30263	1.34896	1.20306	1.34899		1.35388	3.67777	3.54915		1.67784	1.5517	1.68995		3.23998	3.22543	3.09112		2.53718	2.4599	3.4575	3.48825	3.368		1.23666
			Nb	6.58	6.56	10.24	7.09797	7.09231	7.05065	11.9116		7.23715	8.16369	8.33517	7.87964	7.74697		10.4711	7.99716	6.74617		16.7064	14.2045	13.8598	7.07068	6.94498	7.1958	6.53245	7.08887		7.20767	18.8256	18.3959		8.30925	7.98575	8.31173		16.6663	16.7681	16.5264		11.668	11.4152	19.5076	19.8022	19.4066		7.82287
			Y	31.46	31.5	40.1	31.4055	31.3322	31.1031	34.744		30.8419	31.7477	32.2	30.8633	30.7543		38.0181	31.2241	29.9125		38.5615	33.2997	35.4629	31.173	30.2921	32.2565	29.0857	30.7805		32.2974	45.5988	45.1568		31.0933	31.663	31.7665		39.5051	40.2765	39.1392		42.4918	41.2435	43.4334	43.4946	42.5119		29.215
			Hf	3.24	3.23	4.43	3.21446	3.33092	3.30517	4.43874		3.38991	3.48552	3.59948	3.47699	3.3089		4.24665	3.46779	3.11416		5.78837	4.78752	4.97761	3.27459	3.24335	3.32987	3.02228	3.28597		3.35348	6.52317	6.57366		3.50734	3.53863	3.54944		5.80717	5.82796	5.71058		4.89987	4.68685	6.55976	6.57445	6.34535		3.3717
			Ta	0.43	0.44	0.66	0.454519	0.46387	0.4632	0.724216		0.472256	0.524935	0.519806	0.496514	0.486514		0.646959	0.491027	0.432245		0.992748	0.868822	0.840466	0.444137	0.449664	0.477296	0.42966	0.483329		0.440751	1.16487	1.14648		0.503364	0.483893	0.495722		1.03847	1.03875	1.02549		0.700412	0.696564	1.19842	1.20023	1.18884		0.446251
			U	0.44	0.45	0.73	0.458932	0.45877	0.452543	0.737816		0.471665	0.542946	0.562459	0.491599	0.507399		0.616549	0.486898	0.43013		0.9482	0.857976	0.825238	0.439239	0.436592	0.459362	0.402908	0.445146		0.456734	1.29332	1.26928		0.520576	0.503097	0.530832		1.10457	1.12056	1.12899		0.851037	0.799524	1.22375	1.25231	1.19772		0.423173
			Pb	2.44	2.28	10.96	3.29123	2.3606	2.31472	3.89138		2.75018	2.68268	2.8139	2.77585	2.4408		3.36053	2.7558	2.17345		5.02077	4.53547	4.30716	2.2741	2.29076	2.29401	2.0898	2.26988		2.28757	5.59433	5.48012		2.85206	2.7439	2.83931		4.85974	4.91887	4.69497		3.92349	4.17488	5.63656	5.69377	5.62319		3.13301
			Rb	9.1	9.1	18.6	10.9936	10.6166	10.8397	20.9412		8.88718	12.4776	15.7087	13.6058	15.5892		17.1039	1.17415	9.76275		24.8162	18.8693	21.2028	4.14597	9.21613	11.6096	10.2179	8.86048		11.01	22.2297	30.7037		14.0571	12.4285	13.4948		2.39993	10.3067	19.0073		20.3077	19.7284	22.7269	24.5606	24.0889		10.7513
			Cs	0.21	0.17	0.4	0.235042	0.252708	0.304763	0.461032		0.123561	0.381918	0.451041	0.244089	0.460225		0.417363	0.0229727	0.23632		0.556146	0.250965	0.443512	0.0536967	0.193076	0.283889	0.225781	0.150646		0.261275	1.04523	0.542244		0.34319	0.251287	0.28369		0.0838595	0.484656	0.697222		0.508548	0.403109	0.71707	0.72268	0.816826		0.175211
			Sr	272	273	242	275.101	275.794	272.312	311.351		315.355	270.025	261.545	314.943	260.51		291.988	320.4	270.982		388.699	390.966	345.077	271.05	276.39	270.832	273.765	266.936		274.591	340.695	330.097		321.398	325.412	320.137		383.003	376.745	360.258		265.579	254.174	365.087	363.137	365.707		429.894
			Sc	41.1	40.7	38.7	41.2762	40.9057	40.8413	33.8922		37.3535	37.308	36.8556	36.5116	36.9391		43.3698	37.9745	39.6831		30.092	27.8577	31.9305	40.906	40.3262	41.2766	40.1229	40.762		42.8372	32.9825	32.5474		35.4232	38.4197	36.4181		29.1412	30.3583	30.2399		38.8511	38.4238	31.8158	32.0307	30.9177		31.4153
			Zr	119	121	168	120.323	119.793	118.828	171.785		127.775	130.939	133.229	128.748	123.807		158.304	130.746	112.592		223.241	185.686	191.801	118.724	115.606	122.368	109.696	118.805		122.811	254.76	250.031		134.531	130.693	133.886		227.205	228.82	222.913		181.049	176.293	257.006	262.385	252.66		126.773
[truncated: 40 more columns]
