# Supplementary material
Source: MDPI journal article supplement (https://www.mdpi.com/2075-163X/13/12/1544)
Supplement: s1 [file s1 › S8_Supplement Material_additional Chemical data(Malheur Gorge, Siletzia, Cascades).xlsx]

## Sheet: Eastern Malheur Gorge Imnaha
	BW-15-22	CAH17-211	CAH17-239	CAH17-213	CAH17-214	CAH17-215		BW-15-21	CAH17-237	CAH17-238	CAH17-240
Locality	Namorf	eastern Malheur Gorge	Gold Creek	eastern Malheur Gorge	eastern Malheur Gorge	eastern Malheur Gorge		Namorf	Gold Creek	Gold Creek	Gold Creek		BW samples from [17]
Affinity	AB1&2	AB1&2	AB1&2	AB1&2	AB1&2	AB1&2		AB3+	AB3+	AB3+	AB3+
UTM zone	11N							11N					CAH samples collected by Emily Cahoon
Easting	440090							439860
Northing	4847667							4847548
Latitude		43.7937	43.7714	43.7765	43.7947	43.7949			43.7724	43.7719	43.7692
Longitude		-117.854	-117.805	-117.805	-117.85	-117.85			-117.804	-117.805	-117.805
XRF Wt.%, normalized
SiO2	52.5409	52.5661	52.3301	51.4549	52.1187	51.2476		51.8791	51.0563	51.9438	50.9956
TiO2	1.78397	1.81476	1.79779	1.93176	1.97153	1.91549		2.79806	2.74974	2.71904	2.43792
Al2O3	15.2129	14.9195	15.0893	15.4991	14.7025	15.5918		14.4527	15.0518	14.6398	15.2095
FeO*	12.007	11.1863	11.6762	11.3487	12.0352	11.427		13.3656	13.4347	13.1192	12.9596
MnO	0.170997	0.176224	0.175473	0.172743	0.183626	0.227391		0.22187	0.174544	0.172491	0.195183
MgO	4.7332	5.18426	5.27963	6.06068	5.21682	5.74063		3.59059	4.07247	3.75762	4.38933
CaO	8.94362	9.70431	9.27922	9.21429	9.20496	9.65728		9.10602	9.54417	9.09158	9.43632
Na2O	3.2803	3.26104	3.24868	3.09419	3.28286	2.99674		3.21614	3.06525	3.20283	3.22608
K2O	1.0694	0.926568	0.859747	0.928907	0.95976	0.900128		0.978977	0.467358	0.970517	0.768945
P2O5	0.25774	0.260914	0.263886	0.294747	0.324098	0.295876		0.390914	0.383741	0.383154	0.381526
pre N Sum	97.1522	98.2395	98.0561	97.9665	98.738	98.1505		96.2307	95.8152	96.8112	97.6155		pre N Sum= total before normalization
LOI %	2.129	1.36795	1.18631	1.37213	0.869274	1.08541		2.67484	3.7704	2.74344	1.85744		LOI = loss on ignition
XRF, ppm
Ni	53.754	54.351	56.529	65.538	41.679	66.738		36.019	29.054	28.855	56.539
Cr	93.738	142.263	94.941	152.163	134.937	154.056		44.6755	34.825	35.621	87.271
Sc	33.456	38.016	34.056	32.868	36.729	32.634		37.81	35.621	36.417	35.46
V	318.342	338.778	324.918	298.782	333.135	293.608		411.631	399.691	400.388	343.962
Ba	417.792	405.999	427.284	375.309	449.856	363.286		411.134	356.707	394.119	389.173
Rb	25.5	19.012	12.998	20.952	17.072	25.344		19.9995	9.4575	19.7925	12.738
Sr	384.234	398.46	402.86	371.663	381.562	393.94		313.823	341.583	321.383	381.425
Zr	128.887	131.77	129.618	143.349	147.652	142.813		201.495	200.301	199.992	190.54
Y	28.356	30.294	29.403	30.492	32.67	30.086		41.79	42.6855	42.188	39.794
Nb	6.63	6.732	7.029	7.722	7.722	8.428		14.129	14.527	14.0295	11.426
Ga	19.176	19.8	19.305	19.305	19.8	19.992		21.492	21.293	21.094	20.7835
Cu	124.338	144.144	135.828	135.531	138.204	137.592		154.225	130.544	126.962	169.125
Zn	107.814	96.03	98.505	97.515	105.237	101.528		133.529	125.867	123.479	119.185
Pb	18.768	4.059	4.851	5.049	5.742	4.214		4.378	4.4775	3.781	3.6445
La	13.77	11.088	12.969	17.226	15.345	13.23		16.517	14.6265	19.9995	13.79
Ce	29.478	29.205	32.967	30.987	36.927	32.046		42.586	47.959	45.372	45.507
Th	3.672	2.475	3.069	1.683	3.465	2.45		2.6865	3.8805	2.8855	2.4625
Nd	19.584	19.602	18.711	20.889	23.166	20.188		26.865	27.3625	25.87	28.0725
U	1.632	1.485	0.495	1.485	2.178	1.764		2.0895	1.2935	3.0845	1.97
ICP-MS, ppm
La	13.4208	13.1177	13.3732	14.3588	15.5412	14.393		20.3997	20.1165	20.2363	18.565
Ce	30.0975	30.085	30.2711	32.8655	35.1852	32.9743		46.1258	45.1405	45.5564	42.2809
Pr	4.19992	4.24993	4.22837	4.64933	4.94378	4.66591		6.3592	6.31188	6.35107	5.9447
Nd	19.0982	19.3927	19.0805	20.9874	22.2622	21.0095		28.7292	28.4447	28.3915	27.3804
Sm	5.07189	5.19978	5.06828	5.57395	6.03659	5.50047		7.6595	7.49871	7.59458	7.34437
Eu	1.72181	1.79105	1.77498	1.86769	1.9839	1.84589		2.44784	2.47064	2.42868	2.2969
Gd	5.45773	5.81124	5.60232	5.92932	6.44499	6.0215		8.25747	8.19007	8.14919	7.91165
Tb	0.93947	1.00001	0.932582	1.00242	1.05678	1.01986		1.39281	1.37332	1.35702	1.31281
Dy	5.7486	6.2193	5.76057	6.11745	6.60682	6.11819		8.57278	8.51367	8.44145	7.97463
Ho	1.15909	1.24003	1.17454	1.22632	1.33518	1.21738		1.70644	1.75025	1.74228	1.60574
Er	3.13313	3.28815	3.08453	3.20898	3.52099	3.23453		4.63169	4.67385	4.56547	4.27852
Tm	0.43297	0.472403	0.437135	0.45461	0.495375	0.453696		0.656698	0.651382	0.644379	0.599845
Yb	2.63502	2.87075	2.70145	2.71226	3.04327	2.71602		3.92902	4.01869	3.99377	3.729
Lu	0.409688	0.428486	0.415497	0.413929	0.461551	0.430561		0.619658	0.617001	0.603088	0.57378
Ba	418.623	406.104	421.826	377.606	449.856	360.785		391.59	352.857	393.557	393.143
Th	2.29202	1.77766	2.25395	2.07069	2.34475	2.03114		2.74294	2.75987	2.73366	2.43484
Nb	6.67422	6.31374	6.80863	8.12239	7.79644	8.11056		14.2155	14.0314	14.107	11.8826
Y	28.8256	30.9643	29.55	30.3903	33.2551	30.7078		42.4063	44.2104	43.1293	40.708
Hf	3.49298	3.62329	3.5082	3.84782	3.98626	3.87609		5.50115	5.30507	5.28822	5.08507
Ta	0.446259	0.422328	0.456549	0.545425	0.528961	0.538354		0.95066	0.900337	0.911312	0.733119
U	0.867086	0.621845	0.860607	0.781495	0.81595	0.747143		0.855404	0.771751	0.864584	0.767153
Pb	19.2847	3.71634	4.46604	3.90871	4.41982	4.02916		4.21805	4.00206	3.91411	3.62199
Rb	24.1857	18.0207	11.4801	19.8899	15.9546	24.5326		19.2655	7.99635	18.4227	11.2168
Cs	0.835821	0.423684	3.10415	3.8611	0.777556	1.13779		0.478707	2.96378	1.80273	14.9461
Sr	386.742	403.317	407.329	377.152	386.696	400.723		314.21	343.475	326.007	392.873
Sc	34.8862	40.0335	34.9136	33.3997	37.1935	33.0402		36.1708	36.8212	36.439	35.7255
Zr	127.951	131.585	130.76	144.261	149.663	143.372		203.724	203.935	202.591	197.424

## Sheet: Siletzia data 
Data excerpt of [69]	Siletzia	Low K, Low Ti				Mid K, Mid Ti				High K, high Ti
	Sample ID	RS05-H6-8	RS05-H6-9	Avg low Ti		RS05-H6-3	RS05-H6-4A	Avg mid Ti		RS05-H6-4B	RS05-H6-6	RS05-H6-7	RS05-H6-1	Avg high Ti
	UTM zone	10	10			10	10			10	10	10	10
	Easting	454556	452671			469972	468830			468830	465688	464729	473324
See thesis for details of	Northing	5045540	5038836			5051383	5051850			5051850	5050187	5050253	5054804
analytical methods.
	XRF wt.% normalized
	SiO2	48.6102	48.7179	48.6641		53.2868	47.8226	50.5547		48.7744	48.3205	49.2385	50.6949	49.2571
	TiO2	2.5535	2.28988	2.42169		3.0522	2.79428	2.92324		3.85106	4.04408	3.0892	3.38874	3.59327
	Al2O3	14.1003	14.9431	14.5217		14.3999	14.6286	14.5143		15.7615	14.1276	19.4795	14.9397	16.0771
	FeO*	11.9438	11.4839	11.7138		10.7518	11.7618	11.2568		12.5624	14.5569	11.4541	12.1796	12.6882
	MnO	0.200839	0.215216	0.208027		0.227528	0.194898	0.211213		0.213104	0.183487	0.131618	0.22466	0.188217
	MgO	6.93799	7.14948	7.04374		4.60334	7.54633	6.07484		3.96306	4.55206	3.28202	3.9992	3.94908
	CaO	12.6177	11.8815	12.2496		10.2556	12.1172	11.1864		9.53348	9.71622	6.62072	8.49062	8.59026
	Na2O	2.38579	2.66997	2.52788		2.45036	2.20108	2.32572		3.61118	3.10936	5.1071	3.94532	3.94324
	K2O	0.479149	0.421028	0.450089		0.592737	0.634351	0.613544		1.06396	0.937447	1.23337	1.56343	1.19955
	P2O5	0.170748	0.228129	0.199438		0.379706	0.298858	0.339282		0.665831	0.452312	0.36392	0.573775	0.513959
	Total	100	100	100		100	100	100		100	100	100	100	100
	XRF ppm
	Ni	65.3	80	72.65		21.3	114.3	67.8		8.5	10.1	67.9	3.2	22.425
	Cr	150.2	214.1	182.15		18.3	230.9	124.6		6.1	6.5	58	4.6	18.8
	Sc	47.3	40.8	44.05		23.5	33.7	28.6		25.5	30.6	24.2	21	25.325
	V	391.8	339.1	365.45		318.9	348.3	333.6		283.5	389.7	286	223.2	295.6
	Ba	113.3	129.4	121.35		188.3	167.1	177.7		298.7	245.7	510.3	353.9	352.15
	Rb	6.1	6.4	6.25		4.8	10.4	7.6		13	17.6	16.3	34.3	20.3
	Sr	228.7	217.3	223		435.2	385.6	410.4		502.9	443.2	724.3	484.5	538.725
	Zr	118.3	145.5	131.9		194.8	166	180.4		296.7	241.2	186.3	328.5	263.175
	Y	25.5	29.4	27.45		26.9	24	25.45		39.8	33	23.6	40.1	34.125
	Nb	11.9	13.9	12.9		35.9	28.9	32.4		57.1	43.4	34.9	58.7	48.525
	Ga	17.3	19.7	18.5		22.6	19.3	20.95		24.1	22.2	22.6	23.9	23.2
	Cu	170.7	168.8	169.75		37.4	114.1	75.75		24.8	24.1	45.5	8.5	25.725
	Zn	98.3	98.2	98.25		104.7	97	100.85		137.7	131.5	85.4	136.7	122.825
	Pb	0	0	0		0.7	0.5	0.6		1.2	2	0	0.9	1.025
	La	10.1	12.1	11.1		26.8	19.3	23.05		40	34.7	28.5	44.3	36.875
	Ce	24.7	30.3	27.5		55.2	54	54.6		89.7	78.4	59.8	99	81.725
	Th	0	0	0		1	0	0.5		1.9	0.8	0.7	2.6	1.5
	Nd	16.8	20.4	18.6		30.4	30.5	30.45		46.7	41.1	29	53.3	42.525
	ICP-MS, ppm
	La	9.9487	11.553	10.7509		26.0881	22.8156	24.4518		43.5169	33.0279	27.5924	47.0233	37.7901
	Ce	21.887	26.4079	24.1475		53.4318	46.3968	49.9143		86.7607	66.7989	52.8923	92.3641	74.704
	Pr	2.96119	3.56846	3.26482		6.4341	5.63233	6.03322		10.2491	8.01347	6.08148	10.8833	8.80685
	Nd	14.0341	17.1405	15.5873		27.7529	24.8423	26.2976		43.6669	34.7142	25.7938	45.7831	37.4895
	Sm	4.27924	5.09477	4.68701		6.84615	6.12502	6.48558		10.4139	8.49686	6.13099	10.9084	8.98754
	Eu	1.59157	1.8066	1.69909		2.29089	2.07237	2.18163		3.37753	2.80519	2.11293	3.43609	2.93293
	Gd	4.73667	5.64651	5.19159		6.47376	5.94096	6.20736		9.8425	8.25324	5.76126	10.0247	8.47042
	Tb	0.819653	0.968043	0.893848		1.00382	0.926603	0.965214		1.50588	1.27577	0.883613	1.55577	1.30526
	Dy	5.14434	5.93706	5.5407		5.77189	5.25035	5.51112		8.7194	7.18151	5.11121	8.6738	7.42148
	Ho	1.00937	1.16571	1.08754		1.05974	0.95995	1.00984		1.63705	1.33359	0.956815	1.61278	1.38506
	Er	2.69636	3.08255	2.88945		2.61696	2.40457	2.51076		4.11239	3.32407	2.42941	4.02958	3.47386
	Tm	0.37316	0.420092	0.396626		0.339528	0.314159	0.326843		0.546757	0.439424	0.329362	0.533666	0.462302
	Yb	2.28538	2.5656	2.42549		1.91137	1.7754	1.84338		3.17532	2.52823	1.92426	3.08604	2.67846
	Lu	0.338165	0.38619	0.362178		0.287647	0.264411	0.276029		0.47149	0.370843	0.284964	0.458792	0.396522
	Ba	103.069	119.984	111.527		183.007	161.133	172.07		291.086	233.833	487.939	344.012	339.217
	Th	0.834987	1.00215	0.918566		3.04461	2.43039	2.7375		4.71589	3.61305	3.14829	5.55247	4.25743
	Nb	10.676	12.6351	11.6555		35.3185	29.6372	32.4778		59.3732	44.7343	35.137	61.3836	50.157
	Y	26.3096	28.987	27.6483		26.2352	24.6404	25.4378		41.7466	34.4263	23.8738	41.3722	35.3547
	Hf	2.99865	3.66954	3.33409		4.86487	4.26646	4.56567		7.25809	6.02511	4.5943	8.07618	6.48842
	Ta	0.729475	0.868846	0.799161		2.39228	1.97561	2.18395		3.89584	2.96735	2.29678	4.04883	3.3022
	U	0.22439	0.278625	0.251507		0.726213	0.64967	0.687941		1.17966	0.969206	0.843054	1.42505	1.10424
	Pb	0.603994	0.496691	0.550343		1.71534	1.26763	1.49149		2.16216	1.90605	1.81441	3.24864	2.28282
	Rb	5.67725	5.56017	5.61871		4.83677	9.87434	7.35555		12.3535	16.8559	15.9615	33.2727	19.6109
	Cs	0.13692	2.35957	1.24825		0.00790077	0.050758	0.0293294		0.0355054	0.069615	0.262198	0.152148	0.129867
	Sr	232.748	213.978	223.363		432.65	391.374	412.012		513.849	453.188	730.082	494.501	547.905
	Sc	50.1425	40.5334	45.338		23.1804	35.4869	29.3336		25.0373	30.8911	25.6103	22.9561	26.1237
	Zr	106.992	131.488	119.24		180.882	158.031	169.457		286.971	228.298	176.784	317.398	252.363
	Radiogenic isotopes
	143/144norm	0.512951	0.512923							0.512912	0.51289
	ppm err	6.49147	10.5078							9.31879	7.70099
	eNd	6.09594	5.55368							5.33521	4.91974
	87Sr/86Sr	0.703404	0.703502							0.703342	0.703411
	ppm err	6	6							7	8
	206Pb/204Pb	19.2095	19.2535							19.4657	19.4572
	207Pb/204Pb	15.5973	15.5678							15.6032	15.6071
	208Pb/204Pb	38.9645	38.9318							39.2528	39.2423

## Sheet: Cascade literature data
	sample ID	RC02-08	MJ-492	Newberry, avg CA basalt	88C1557	LC82-905	Wuksi volcanic chain, average
	volcano	Boring	Mt. Jefferson	Newberry	Crater Lake	Lassen	Wuksi
	data source	[69]	[74]	[56]	[73]	[73]	Streck, unpubl.
				average of 13 samples			average of 10 samples
	Normalized Major Elements (Weight %):
	SiO2	51.4979	54.2	51.5796	52.1	49.7	52.3562
	TiO2	1.1786	1.14	1.04494	1.12	0.98	1.41264
	Al2O3	16.6915	18.24	17.3992	17.3	17.5	17.257
	FeO*	7.49982	8.1	7.76892	7.85	8.32	8.79291
	MnO	0.127761	0.13	0.137241	0.14	0.16	0.153991
	MgO	8.42236	4.88	8.38672	7.59	8.32	6.60755
	CaO	9.40537	8.62	9.52722	9.42	9.66	8.64423
	Na2O	3.63122	3.65	3.10172	3.52	3.1	3.51134
	K2O	1.1779	0.73	0.795454	0.67	0.66	0.869877
	P2O5	0.367636	0.34	0.258248	0.26	0.25	0.394277
	La ppm	30.786	16.28	14.3009	9.93	11.48	18.3615
	Ce ppm	59.6843	37.31	31.8277	24.62	26.52	39.2166
	Pr ppm	7.02587	4.24	4.32921			5.0532
	Nd ppm	28.2231	21.62	18.459	13.39	14.87	22.5316
	Sm ppm	5.3685	4.85	4.19751	3.55	3.35	5.37995
	Eu ppm	1.67275	1.42	1.38702	1.24	1.05	1.78015
	Gd ppm	4.25183	4.578	4.03693	3.63	3.32	5.09681
	Tb ppm	0.589656		0.644492			0.803567
	Dy ppm	3.37634	3.64	3.89315	3.6	3.46	4.76931
	Ho ppm	0.638377	0.81	0.792786			0.95237
	Er ppm	1.63523	2.36	2.12603	2.07	2.14	2.54669
	Tm ppm	0.23159		0.307788			0.358375
	Yb ppm	1.39355	2	1.89218	1.85	2.02	2.19634
	Lu ppm	0.220141	0.32	0.298014			0.344382
	Ba ppm	468.777	299	365.52	259	205	343.739
	Th ppm	3.53191	1.42	1.83678	1.19	1.74	1.59854
	Nb ppm	10.0663	11	5.86264	4.1	7.8	11.4991
	Y ppm	16.8873	23	20.0472	21	19	25.1825
	Hf ppm	3.07505	3.06	2.69748	2.81	2.43	3.59251
	Ta ppm	0.524543	0.76	0.427777	0.27	0.511	0.702351
	U ppm	0.744078		0.636655	0.52	0.58	0.502066
	Pb ppm	4.29926		3.56313	2.64	4.3	3.90215
	Rb ppm	6.03342	10	13.7262	6.5	7.2	10.0385
	Cs ppm	0.0755625		0.428874	0.21	0.23	0.252275
	Sr ppm	1152.21	702	608.105	585	405	697.011
	Sc ppm	23.2075	19.2	24.9563	25.8	32.4	26.4094
	Zr ppm	118.398	161	104.571	130	108	145.376
